# Supplementary material for: Long-term results of a phase II study of two courses of neoadjuvant chemotherapy with S-1 plus oxaliplatin for cT4 or N2-3 gastric cancer
Source: Research Square preprint supplement (doi:10.21203/rs.3.rs-3217377/v1), 2023-08-04
Supplement: Supplementary file 1 [file 3497dd93226dd0955a5c41cb.xlsx]

## Sheet: Sheet1
Category	Classification	Univariate analysis					Multivariate analysis
		n	Proportion	5-year RFS	P value		Hazard ratio	95% CI	P value
Age (years)	>70	16	0.53	0.74	0.8343		7.67	0.31-190.52	0.2139
	≤70	14	0.47	0.71			0.13
Sex	Male	23	0.77	0.78	0.3260		0.080	0.0022-2.92	0.1690
	Female	7	0.23	0.57			12.44
Bulky N2 lymph nodes	+	6	0.2	1	0.1183		NA	NA	0.9994
	-	24	0.8	0.66			NA
Cancer type	Type 4	3	0.1	0	<0.001		64.90	1.75-2411.96	0.0237
	Non type 4	27	0.9	0.81			0.015
Resection	R0	28	0.93	0.78	0.0064		0.16	0.0023-11.20	0.3993
	R1	2	0.07	0			6.19
ypStage	I-II, unclassifiable	22	0.73	0.82	0.0823		2.70	0.095-76.90	0.5606
	III-IV	8	0.27	0.47			0.37
Pathological response	≥grade1b	19	0.63	0.79	0.3471		0.32	0.065-1.54	0.1541
	<grade1b	11	0.37	0.64			3.17
NA: not applicable, OS: overall survival, CI: confidence interval
