# Supplementary material for: Long-term results of a phase II study of two courses of neoadjuvant chemotherapy with S-1 plus oxaliplatin for cT4 or N2-3 gastric cancer
Source: Research Square preprint supplement (doi:10.21203/rs.3.rs-3217377/v1), 2023-08-04
Supplement: Supplementary file 2 [file 69d74147c9b7d1e050767a60.xlsx]

## Sheet: Sheet1
Category	Classification	Univariate analysis					Multivariate analysis
		n	Proportion	5-year OS	P value		Hazard ratio	95% CI	P value
Age (years)	>70	16	0.53	0.74	0.8077		2.98	0.27-32.50	0.3694
	≤70	14	0.47	0.71			0.34
Sex	Male	23	0.77	0.78	0.4099		0.19	0.01-3.55	0.2655
	Female	7	0.23	0.57			5.29
Bulky N2 lymph nodes	+	6	0.2	1	0.1231		NA	NA	0.9993
	-	24	0.8	0.66			NA
Cancer type	Type 4	3	0.1	0	<0.001		15.27	1.20-194.57	0.0358
	Non type 4	27	0.9	0.81			0.07
Resection	R0	28	0.93	0.78	0.0043		0.09	0.0030-2.73	0.1667
	R1	2	0.07	0			11.12
ypStage	I-II, unclassifiable	22	0.73	0.82	0.0874		2.17	0.12-37.65	0.5950
	III-IV	8	0.27	0.42			0.46
Pathological response	≥grade1b	19	0.63	0.78	0.3947		0.55	0.12-2.43	0.4318
	<grade1b	11	0.37	0.64			1.81
NA: not applicable, OS: overall survival, CI: confidence interval
