# Supplementary material for: Long-term results of a phase II study of two courses of neoadjuvant chemotherapy with S-1 plus oxaliplatin for cT4 or N2-3 gastric cancer
Source: Research Square preprint supplement (doi:10.21203/rs.3.rs-3217377/v1), 2023-08-04
Supplement: Supplementary file 3 [file d253f306b0373af9c3d23982.xlsx]

## Sheet: Sheet1
Trial or authors	Phase	Targets	Regimen	Cycles	Sample size	R0 rate (%)	Pathological response (%)	3-year OS rate (%)	Completed rate of the planed NAC and surgery (%)
JCOG0405 [8]	2	Bulky N, PAN, excluding type 4	CS	2-3	53	82	51	59	88
JCOG0501 [9, 3]	3	Type 4, large type 3	CS	2	316	81	51	61	90
Neo G-SOX PII [10]	2	Bulky N, Type 4, large type 3	SOX	2	41	b88	41	NA	95
Our study	2	cT3-4b or N2-3b	SOX	2	30	93	63	80	100
KSCC 1601 [11]	2	cT3-4b or N1-3b, including EGJC	SOX	3	47	87	60	63	89
RESOLVE [12]	3	T4aN+ or T4bNanyM0, including EGJC	SOX	3	1094	93	c5.6	68	87
JCOG1509 [13]	3	cT3-4N1-3M0	SOX	3	a470	ongoing	ongoing	ongoing	NA
RESONANCE [14]	3	Stage IIA-IIIC	SOX	2-4	772	73	68	NA	NA
RESONANCE-II [15]	3	cT3-4aN1-3M0	SOX	3 or 6	524	ongoing	ongoing	ongoing	ongoing
Zhang et al. [16]	2	cT3-4Nany	PTXS	3	26	92	d35	f56	64
			SOX	3	77	94	d49	f61
Dragon III [17]	2	cT3-4bN1-3M0	FLOT	4	40	87	d68	NA	78
			SOX	3	34	100	d75	NA	71
FLOT4 [18]	2/3	cT2 or higherNanyM0, including EGJC	FLOT	4	716	85	NA	g57	94
			ECF/ECX	3		78	NA	g48	87
OGSG 1601 [19]	2	cT3-4aN1-3M0	CapeOX	3	37	78	54	NA	89
OGSG 1902 [20]	2	Type 4, large type 3	DOS	3	46	ongoing	ongoing	ongoing	ongoing
Kurokawa et al. [21]	2	cStageIII, including EGJC	DOS	2-3	50	98	63	69	94
PRODIGY [22]	3	T2-3N+ or T4Nany	DOS	3	530	95	c10	74	90
JCOG1002 [23, 24]	2	Bulky N, PAN	DCS	2-3	53	85	50	63	87
KDOG1001 [25, 26]	2	Bulky N, Type 4, large type 3	DCS	4	40	90	58	78	63
Aoyama et al. [27]	2	cT3-4bNanyM0	CS	2 or 4	66	77	e19	NA	h71
			DCS	2 or 4	66	83	e15	NA	h88
OS: overall survival, NAC: neoadjuvant chemotherapy, PAN: para-aortic lymphnode metastasis, EGJC: esophagogastric junction cancer, CS: cisplatin and S-1, SOX: S-1 and oxaliplatin
PTXS: paclitaxel and S-1, FLOT: fluorouracil, leucovorin, oxaliplatin, and docetaxel, ECF/ECX: epirubicin, cisplatin, and either fluorouracil or capecitabine, CapeOX: capecitabine and oxaliplatin
DOS: docetaxel, oxaliplatin, and S-1, DCS: docetaxel, cisplatin, and S-1
a: planned number, b: including R1, c: complete response rate, d: according to Tumor regression grade, e: defined as a complete response or less than 10% of the residual cancer remaining
f: 5-year OS, g: estimated, h: the completed rate of planed NAC
