# Supplementary material for: Long-term results of a phase II study of two courses of neoadjuvant chemotherapy with S-1 plus oxaliplatin for cT4 or N2-3 gastric cancer
Source: Research Square preprint supplement (doi:10.21203/rs.3.rs-3217377/v1), 2023-08-04
Supplement: Supplementary file 4 [file d2fe8fb087906bd340e51c74.xlsx]

## Sheet: Sheet1
Trial or authors	Regimen	Hematological adverse events (%)									Non-hematological adverse events (%)
		Neutropenia	Leukopenia	Anemia	Thrombocytopenia	Aminotransferase increased	FN	Hyponatremia	Hypokalemia		Anorexia	Nausea	Diarrhea	Vomiting	Fatigue	Appetite loss	Stomatitis	Dyspnea	Upper respiratory tract infection
JCOG0405 [8]	CS	19	4	13	4	0	0	0	0		10	4	2	0	0	0	0	0
JCOG0501 [9, 3]	CS	29.3	7.5	4.1	0	0	0	6.8	0		11.6	5.4	4.8	2.7	0	0	0	0	0
Our study	SOX	0	0	3.3	0	0	0	0	0		6.7	3.3	0	3.3	3.3	0	0	0	0
KSCC 1601 [11]	SOX	6.4	0	4.3	10.6	0	0	0	0		0	0	6.4	0	0	12.8	0	0	0
RESOLVE [12]	SOX	10	1	3	5	2	0	0	0		0	0	0	0	1	0	0	0	0
Dragon III [17]	FLOT	6.5	3.2	12.9	3.2	3.2	0	0	0		0	3.2	0	3.2	0	0	0	0	0
	SOX	8.3	0	8.3	0	0	4.2	0	0		0	0	0	0	0	0	0	0	0
FLOT4 [18]	FLOT	51	27	3	2	1-2	2	0	0		0	7	10	2	0	0	1	0	0
	ECF/ECX	39	21	6	3	<1	1	0	0		0	16	4	8	0	0	3	0	0
OGSG 1601 [19]	CapeOX	8	5	3	8	0	0	0	0		8	3	8	0	3	0	3	0	0
Kurokawa et al. [21]	DOS	69	0	4	0	4-6	13	13	0		6	2	19	0	2	0	0	0	0
PRODIGY [22]	DOS	12.6	0	0	0	0	9.2	0	0		2.1	2.5	5	2.5	2.9	0	2.1	0.4	0
JCOG1002 [23, 24]	DCS	39.6	18.9	7.5	1.9	0	5.7	15.1	5.7		9.4	1.9	7.5	0	0	0	0	0	1.9
KDOG1001 [25, 26]	DCS	55	27.5	12.5	0	0	7.5	22.5	0		20	15	10	0	0	0	0	0	0
Aoyama et al. [27]	CS	30.6	14.5	14.5	3.2	0	0	0	0		12.9	1.6	3.2	0	6.5	0	0	0	0
	DCS	47	25.8	12.1	1.5	0	0	0	0		19.7	9.1	6.1	4.5	4.5	0	3	0	0
FN: febrile neutropenia, CS: cisplatin and S-1, SOX: S-1 and oxaliplatin, FLOT: fluorouracil, leucovorin, oxaliplatin, and docetaxel, CapeOX: capecitabine and oxaliplatin, DOS: docetaxel, oxaliplatin, and S-1, DCS: docetaxel, cisplatin, and S-1
