# Supplementary material for: Long-term results of a phase II study of two courses of neoadjuvant chemotherapy with S-1 plus oxaliplatin for cT4 or N2-3 gastric cancer
Source: Research Square preprint supplement (doi:10.21203/rs.3.rs-3217377/v1), 2023-08-04
Supplement: Supplementary file 5 [file dc5083b1408bfe3c9aa68455.xlsx]

## Sheet: Sheet1
		Values
Age (years), median (range)		71.0 (48-80)
Sex male/female		23/7
ECOG performance status 0/1		26/4
aCancer type (%)
	Bulky N2 lymph nodes	6 (20)
	Type 4	3 (10)
	Type 3	17 (57)
	Type 2	8 (27)
	Type 1	2 (6)
Tumor depth (%)
	cT3	7 (23)
	cT4a	23 (77)
	cT4b	0 (0)
Lymph node metastases (%)
	cN0	5 (17)
	cN1	10 (33)
	cN2	14 (47)
	cN3	1 (3)
cStage (%)
	IIB	6 (20)
	IIIA	16 (53)
	IIIB	8 (27)
	IIIC	0 (0)
Resection (%)
	R0	28 (93)
	R1	2 (7)
ypStage (%)
	IA	3 (10)
	IB	6 (20)
	IIA	5 (17)
	IIB	6 (20)
	IIIA	5 (17)
	IIIB	0 (0)
	IIIC	2 (7)
	IV	1 (3)
	Unclassifiable	2 (7)
Pathological response (%)
	Grade 0	1 (3)
	Grade 1a	10 (33)
	Grade 1b	4 (13)
	Grade 2	13 (43)
	Grade 3	2 (7)
Adjuvant chemotherapy (%)
	S-1	24 (80)
	Capecitabine	1 (3)
	Docetaxel + S-1	2 (7)
	Capecitabine + oxaliplatin	1 (3)
	None	2 (7)
TNM categories are based on the 3rd English edition of Japanese classification of gastric carcinoma
a: Including one patient having both a large type 3 tumor and a bulky N lymph node
